# Supplementary material for: Phage-mediated horizontal transfer of a Staphylococcus aureus virulence-associated genomic island
Source: PubMed Central journal article supplement (PMC4402969; doi:10.1038/srep09784), 2015-04-20
Supplement: srep09784-s1.pdf [file srep09784-s1.pdf]

**Phage-mediated horizontal transfer of a *Staphylococcus aureus* virulence-associated genomic island**

Bo Youn Moon<sup>1,2</sup>, Joo Youn Park<sup>1</sup>, Sun Yung Hwang<sup>2</sup>, D. Ashley Robinson<sup>3</sup>, Jonathan C. Thomas<sup>3</sup>, J. Ross Fitzgerald<sup>4</sup>, Yong Ho Park<sup>2</sup>, Keun Seok Seo<sup>1\*</sup>

<sup>1</sup>Department of Basic Sciences, College of Veterinary Medicine, Mississippi State University, Mississippi state, MS 39762, United States

<sup>2</sup>Department of Microbiology, College of Veterinary Medicine and BK21 Program for Veterinary Science, Seoul National University, Seoul 151-742, South Korea

<sup>3</sup>Department of Microbiology, University of Mississippi Medical Center, Jackson, MS 39216, United States

<sup>4</sup>The Roslin Institute and Edinburgh Infectious Diseases, Royal (Dick) School of Veterinary Studies, University of Edinburgh, Midlothian EH259RG, United Kingdom

\* Corresponding author

Correspondence and requests for materials should be addressed to Keun Seok Seo (email: seo@cvm.msstate.edu)

Supplementary Table S1. Bacterial strains used in this study

| <i>S. aureus</i> strains          | Description                                                                                 | Reference  |
|-----------------------------------|---------------------------------------------------------------------------------------------|------------|
| RF122                             | Bovine mastitis isolate, CC151                                                              | 1,2        |
| RF122 <i>sem::tetM</i>            | Indicative strain for transfer of $\phi$ SaBoV <sub>EGC</sub>                               | This study |
| RF122 <i>SAB1737::tetM</i>        | Indicative strain for transfer of $\phi$ SaBoV <sub>N</sub> and $\phi$ SaBoV <sub>EGC</sub> | This study |
| RF122 <i>lukE::tetM</i>           | Indicative strain for transfer of $\phi$ SaBoV <sub>LUKE</sub>                              | This study |
| RF122 <i>sem::tetM, int::cat</i>  | RF122 <i>sem::tetM</i> $\Delta$ Int                                                         | This study |
| RF122 <i>sem::tetM, terL::cat</i> | RF122 <i>sem::tetM</i> $\Delta$ TerL                                                        | This study |
| MN PE                             | Human MRSA USA200, ST36-SCCmecII                                                            | 1,2        |
| MN Park                           | Human MRSA USA200, ST36-SCCmecII                                                            | 1,2        |
| MN White                          | Human MRSA USA200, ST36-SCCmecII                                                            | 1,2        |
| MN PAM                            | Human MRSA USA200, ST36-SCCmecII                                                            | 1,2        |
| DAR1809                           | Human MRSA USA300, ST8-SCCmecIV                                                             | 3,4        |
| DAR2017                           | Human MRSA USA300, ST8-SCCmecIV                                                             | 3,4        |
| DAR1085                           | Human MRSA USA300, ST8-SCCmecIV                                                             | 3,4        |
| DAR1964                           | Human MRSA USA300, ST8-SCCmecIV                                                             | 3,4        |
| MW2                               | Human MRSA USA400, ST1-SCCmecIV                                                             | 5,6        |
| MN KN                             | Human MRSA USA400, ST1-SCCmecIV                                                             | 7,8        |
| MN Gary                           | Human MRSA USA400, ST1-SCCmecIV                                                             | 5,6        |
| C99-193                           | Human MRSA USA400, ST1-SCCmecIV                                                             | 5,8        |
| C99-529                           | Human MRSA USA400, ST1-SCCmecIV                                                             | 5,8        |
| CTH96                             | Bovine mastitis isolate, CC151                                                              | 9          |

Supplementary Table S2. List of primers used in this study

| Name                                                                               | Sequences (5' to 3')              |
|------------------------------------------------------------------------------------|-----------------------------------|
| Probe synthesis for southern blot                                                  |                                   |
| semf                                                                               | GTGAAAAACTATTATTGTCAGGAT          |
| semr                                                                               | TTGGGTTAATGGCAACCATAAAACA         |
| SAB1737f                                                                           | GAACCAGTACGGATCACGTGAA            |
| SAB1737r                                                                           | GTTGAATATCAGCATTACGATGATGTC       |
| Intf                                                                               | CATCACTGGTGGACGCTTTG              |
| Intr                                                                               | AATGCATCGAGCGCTTTTTTC             |
| pLukD                                                                              | CACTCGTATCACTTGAACCTTTTTCA        |
| pLukE                                                                              | GGTGGCAATGGCTCATTTAATT            |
| Selective marker                                                                   |                                   |
| tetMf                                                                              | GCGCGTCGACGATCAAGAAACAAAGGCAACCCA |
| tetMr                                                                              | GCGCGAATTCTAGGACACAATATCCACTTGTAG |
| Catf                                                                               | GCTAGTCGACACGAAAGTCGAAGGGGGTTTTTA |
| Catr                                                                               | GCTAGAATTCGGCCCGGTACCCAGCTTTT     |
| Allelic replacement of <i>sem</i> , RF122 <i>sem::tetM</i>                         |                                   |
| semupf                                                                             | GCGCGGATCCTCTTAAGTTACCTACACC      |
| semupr                                                                             | GCGCGTCGACGAAAATCATATCGCAACC      |
| semdnf                                                                             | GCGCGAATTCTATCAAGTTCTTGTGCAG      |
| semdnr                                                                             | GCGCAGATCTGTCTATTATCTGAGTCGC      |
| Allelic replacement of untranslation region of SAB1737, RF122 <i>SAB1737::tetM</i> |                                   |
| 1737upf                                                                            | GCGCGGATCCTTATGCTTCACTCCATTTT     |
| 1737upr                                                                            | GCGCGTCGACATGGGCAGTGTTGTAATTAT    |
| 1738dnf                                                                            | GCGCGAATTCTGTTGTTGCATTAAATCACT    |
| 1738dnr                                                                            | GCGCAGATCTTGATATTTAGAGGTGGCACA    |
| Allelic replacement of <i>lukE</i> , RF122 <i>lukE::tetM</i>                       |                                   |
| LukDupf                                                                            | GCGCGGATCCGCAGCCATCTCCAAATTC      |
| LukDupr                                                                            | GCGCGTCGACCTAATCCTGGGGTATAACTG    |
| LukEdnf                                                                            | TGATGAATTCCTATTGCCCGTTAAACGG      |
| LukEdnr                                                                            | ATTGAGATCTCCTGTCCGTTTACTCATTG     |
| Generating integrase knock out strain, RF122 <i>sem::tetM</i> $\Delta$ Int         |                                   |

|        |                                |
|--------|--------------------------------|
| Intupf | GCGCGGATCCGCTCCTTTACGGAGCTTTAA |
| Intupr | GCGCGTCGACAATAAGGGTAGGCGAGCTAC |
| Intdnf | GCGCGAATTCGCATATCTTGGGAACGTTTC |
| Intdnr | GCGCAGATCTAACAGAGAACATGTTGCTAC |

---

Generating terminase knock out strain, RF122 *sem::tetM*  $\Delta$ TerL

---

|        |                                |
|--------|--------------------------------|
| Terupf | GCGCGGATCCTGTCAACATGGCTTTTTCTG |
| Terupr | GCGCGTCGACTTGCTGAGGGTCTTGTGTTC |
| Terdnf | GCGCGAATTCCTTTCCGACCACGGGTAA   |
| Terdnr | GCGCAGATCTACGAAAGTTTGCCGGAAATA |

---

Outward PCR and sequencing

---

|       |                          |
|-------|--------------------------|
| pInt  | CGAGATTTAACGAGGGATAGG    |
| p1702 | TTGACACTAGCTTTCCGTTG     |
| p1693 | CGATGTTAATGGTAGTGATCATGC |
| p1759 | TTTTAGCTAGCGCGTTAGTG     |

---

Linear phage DNA fragment characterization

---

|       |                               |
|-------|-------------------------------|
| p1651 | TCGGCACCACAGTTTCATTC          |
| p1654 | ACCAACAGCACCAGCAATACG         |
| p1655 | CCATTCAGCTTGATCACTCATAACC     |
| p1663 | AACATATTTGTGGTCAGGAGCTGAA     |
| p1664 | GTTAATGCTCTTGGCGTACCAAT       |
| p1675 | TGAAGAAAGAAAATGTACCAGGAAATG   |
| p1676 | TTCTAAGCAAGCACTTACATTTGTACCT  |
| p1691 | ATCATAAGAAGAGAAGAACGAGCTAGACT |
| p1694 | ATGGGATCGCAATACCACC           |
| pseg  | AGCAAGACACTGGCTCACTAA         |

---

Identification of  $\phi$ SaBov integration

---

|                   |                               |
|-------------------|-------------------------------|
| tRNA <sub>r</sub> | GTAGCAACATGTTCTCTGTT          |
| Intf              | AAAGCGCTCGATGCATTG            |
| lukEf             | CACTCGTATCACTTGAACCTTTTTCA    |
| seif              | TCAAGGTGATATTGGTGTAGGTAACCTAA |
| seir              | AAGTGGCCCCTCCATACATG          |
| 1758f             | CGAAGAATACGAATCAAATCAGCTAA    |
| 1692r             | AGCCGTTTCAGCTTGATATAACATAT    |

1760r                    GAGCAATGGGTGTGTCTAATGC

---

Quantitative Real time PCR

---

qrt intf                CAGCGTGAAGAAGAAAAGTTTATGAG

qrt intr                TAAGCGTTGTACTTCGCCAAAG

semf                    GTGAAAAACTATTATTGTCAGGAT

semr                    TTGGGTTAATGGCAACCATAAAACA

---

Verification of chromosomal DNA contamination in phage DNA preparation

---

LPScoreF                TAAAGGTGCGGGAAC TTTCG

LPScoreR                AAGCGAGATCATCTGCCGAG

---

Supplementary Table S3. Increased transduction frequencies of  $\phi\text{SaBoV}_{\text{EGC}}$  and  $\phi\text{SaBoV}_{\text{LUKE}}$  in the intermediate forms of transductants

| Recipient                                                                      | Transfer frequency of $\phi\text{SaBoV}_{\text{EGC}}$ (CFU/pfu)*  |
|--------------------------------------------------------------------------------|-------------------------------------------------------------------|
| MW2                                                                            | $2.5 \times 10^{-7}$                                              |
| MW2 carrying $\phi\text{SaBoV}_{\text{N}}$                                     | $4.6 \times 10^{-5}$                                              |
| MNKN                                                                           | $8.5 \times 10^{-6}$                                              |
| MNKN carrying $\phi\text{SaBoV}_{\text{N}}$                                    | $1.4 \times 10^{-4}$                                              |
| RN4220                                                                         | $9.0 \times 10^{-6}$                                              |
| RN4220 carrying $\phi\text{SaBoV}_{\text{N}}$                                  | $6.0 \times 10^{-5}$                                              |
| Recipient                                                                      | Transfer frequency of $\phi\text{SaBoV}_{\text{LUKE}}$ (CFU/pfu)* |
| MW2                                                                            | $1.50 \times 10^{-8}$                                             |
| MW2 carrying $\phi\text{SaBoV}_{\text{N}}$ and $\phi\text{SaBoV}_{\text{EGC}}$ | $8.50 \times 10^{-7}$                                             |

\*The transduction frequency of  $\phi\text{SaBoV}_{\text{EGC}}$  and  $\phi\text{SaBoV}_{\text{LUKE}}$  was measured using phages induced from RF122 *sem::tetM* and RF122 *lukE::tetM*, respectively.

Supplementary Table S4. *spa* and MLST typing of bovine isolates harboring a phage insertion in the vSaβ.

| ID#   | Ridom<br><i>spa</i><br>type <sup>a</sup> | eGenomics<br><i>spa</i> type <sup>a</sup> | eGenomics <i>spa</i> repeats               | Clonal<br>complex | Sequence<br>type <sup>b</sup> | Alleles at indicated locus |             |             |            |            |            |             |
|-------|------------------------------------------|-------------------------------------------|--------------------------------------------|-------------------|-------------------------------|----------------------------|-------------|-------------|------------|------------|------------|-------------|
|       |                                          |                                           |                                            |                   |                               | <i>arcC</i>                | <i>aroE</i> | <i>glpF</i> | <i>gmk</i> | <i>pta</i> | <i>tpi</i> | <i>yqiL</i> |
| OSU40 | new1                                     | new2                                      | NEW-J1-G1-F1-M1-B1-B1-B1-<br>B1-P1-B1      | 97                | 352                           | 3                          | 78          | 1           | 1          | 1          | 5          | 3           |
| OSU8  | new2                                     | new3                                      | T1-J1-G1-F1-B1-B1-B1-P1-B1                 | 97                | 2187                          | 3                          | 317         | 1           | 1          | 1          | 5          | 3           |
| OSU7  | new2                                     | new3                                      | T1-J1-G1-F1-B1-B1-B1-P1-B1                 | 97                | 2187                          | 3                          | 317         | 1           | 1          | 1          | 5          | 3           |
| OSU17 | t3992                                    | 1319                                      | T1-J1-G1-F1-M1-B1-B1-P1-B1                 | 97                | 2187                          | 3                          | 317         | 1           | 1          | 1          | 5          | 3           |
| OSU19 | t2112                                    | 445                                       | T1-J1-G1-F1-M1-B1-B1-B1-B1-<br>P1-B1       | 97                | 2187                          | 3                          | 317         | 1           | 1          | 1          | 5          | 3           |
| OSU14 | t13401                                   | new1                                      | U1-J1-G1-F1-G1-F1-M1-B1-B1-<br>B1-B1-P1-B1 | 97                | 2187                          | 3                          | 317         | 1           | 1          | 1          | 5          | 3           |
| OSU16 | t267                                     | 105                                       | U1-J1-G1-F1-M1-B1-B1-B1-P1-<br>B1          | 97                | 2187                          | 3                          | 317         | 1           | 1          | 1          | 5          | 3           |
| OSU45 | t529                                     | 102                                       | Z1-B1                                      | 151               | 351                           | 6                          | 72          | 50          | 43         | 52         | 67         | 59          |
| OSU85 | t529                                     | 102                                       | Z1-B1                                      | 151               | 351                           | 6                          | 72          | 50          | 43         | 52         | 67         | 59          |

<sup>a</sup> Ridom and eGenomics *spa* types determined using resources at [www.spaserver.ridom.de](http://www.spaserver.ridom.de) and [www.egenomics.com](http://www.egenomics.com), respectively.

<sup>b</sup> Multilocus sequence types determined using resources as [saureus.mlst.net](http://saureus.mlst.net).

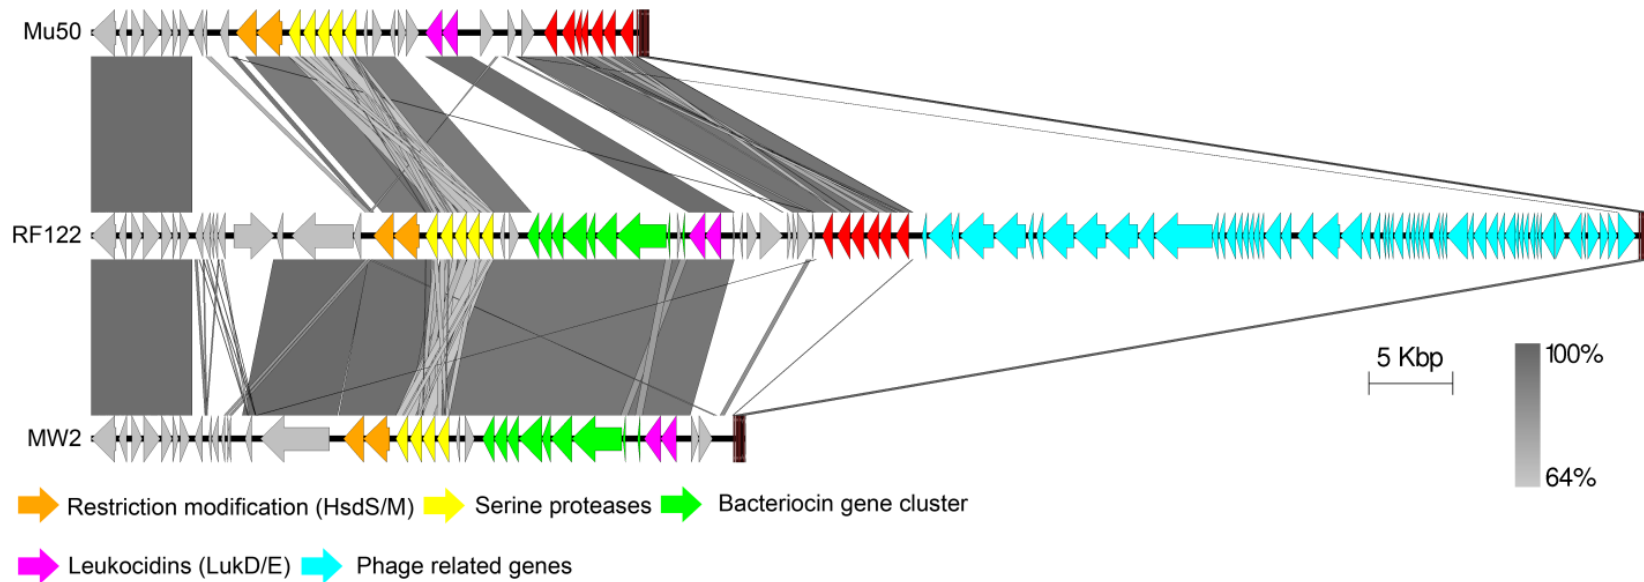

**Supplementary Figure S1. Sequence alignment of vSaβ in Mu50, RF122, and MW2 strains.** The arrow represents annotated genes in the entries<sup>6,10,11</sup> and colored based on key features. Orange; restriction modification system HsdR/M, yellow; serine protease cluster (*spl*), light green; bacteriocin gene cluster (*bsa*), pink; leukocidins (*lukD/E*), red; enterotoxin gene cluster (*egc*), cyan; genes related to phage. Note that the strain Mu50 harbors the *egc* but lacks a bacteriocin gene cluster; the strain MW3 harbors a bacteriocin gene clusters but lacks the *egc*. Uniquely, the strain RF122 harbors bacteriocin gene cluster and the *egc*, as well as the phage ( $\phi$ SaBov) insertion at the upstream of tRNA cluster (brown bar). The shading between the entries represents the percent identity (BLASTn) from 64 % (light gray) to 100 % (dark gray).



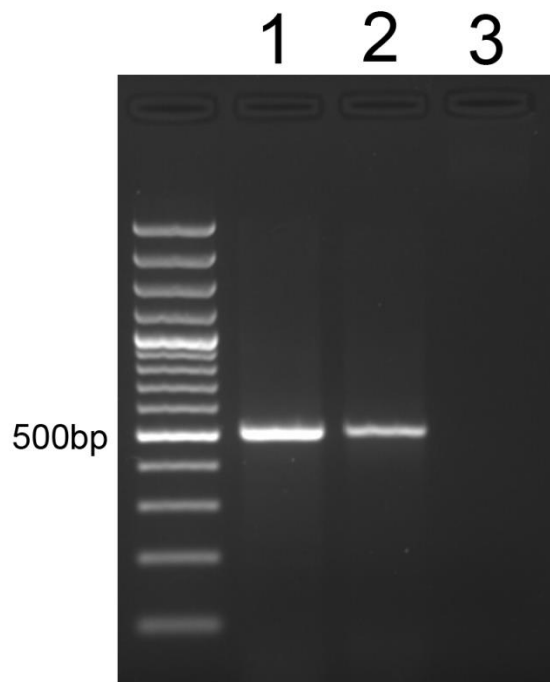

**Supplementary Figure S2. Test for *S. aureus* chromosomal DNA contamination in the phage DNA preparation.** Exogenous chromosomal DNA (*E. coli* DH5 $\alpha$ , 10  $\mu$ g) was added to the mitomycin C-induced culture lysate (10 ml) of the strain RF122, and then treated with excessive amount of RNase and DNase I (100 unit each) for 2 hour, prior to the phage DNA extraction. PCR using primers specific to *E. coli* the *lps* gene (LPScoreF/R) was performed to check chromosomal DNA contamination in the phage DNA preparation. Results shown are PCR results with template using: Lane 1, purified *E. coli* chromosome; lane 2, *E. coli* chromosome added to mitomycin-induced culture lysate (before RNase and DNase I treatment); lane 3, phage DNA extraction after RNase and DNase I treatments.

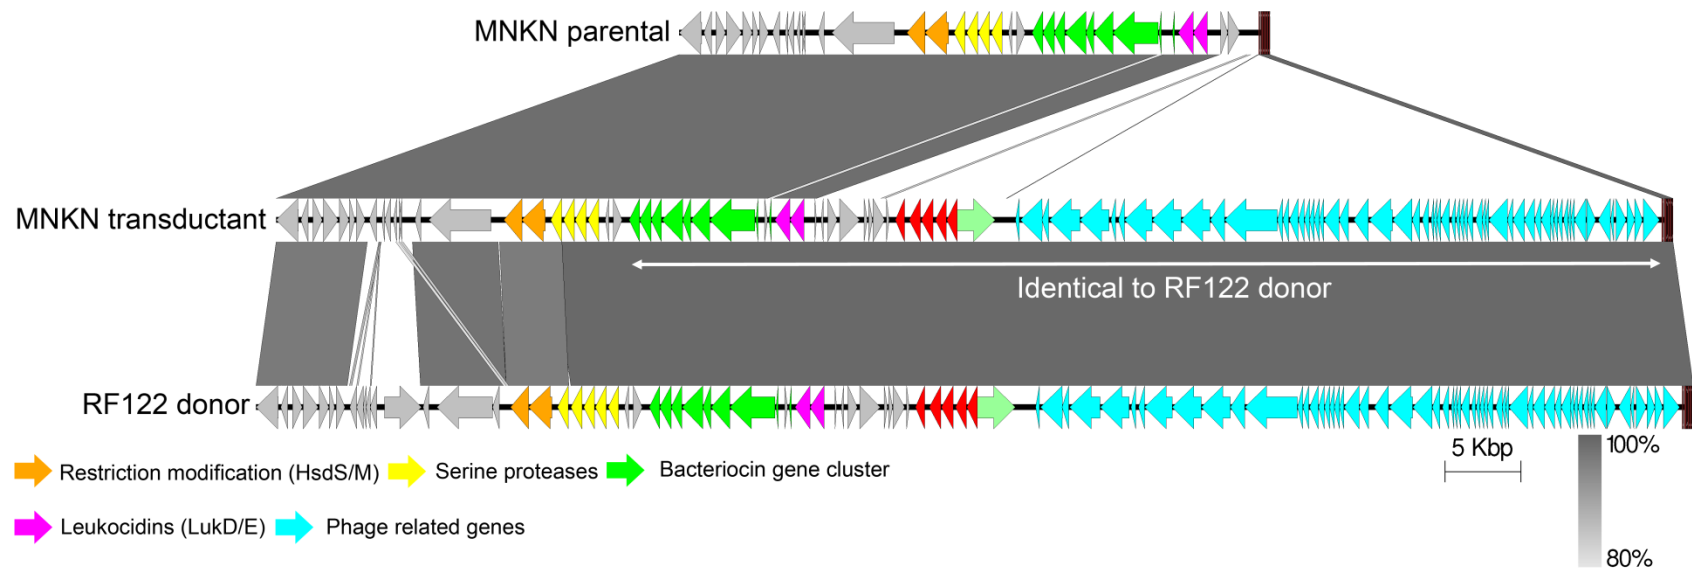

**Supplementary Figure S3. Sequence alignment of vSA $\beta$  in MNKN recipient and transductant with RF122 donor.** White arrow indicated the sequence identical between MNKN transductant and RF122 donor. The shading between the entries represents the percent identity (BLASTn) from 80 % (light gray) to 100 % (dark gray).

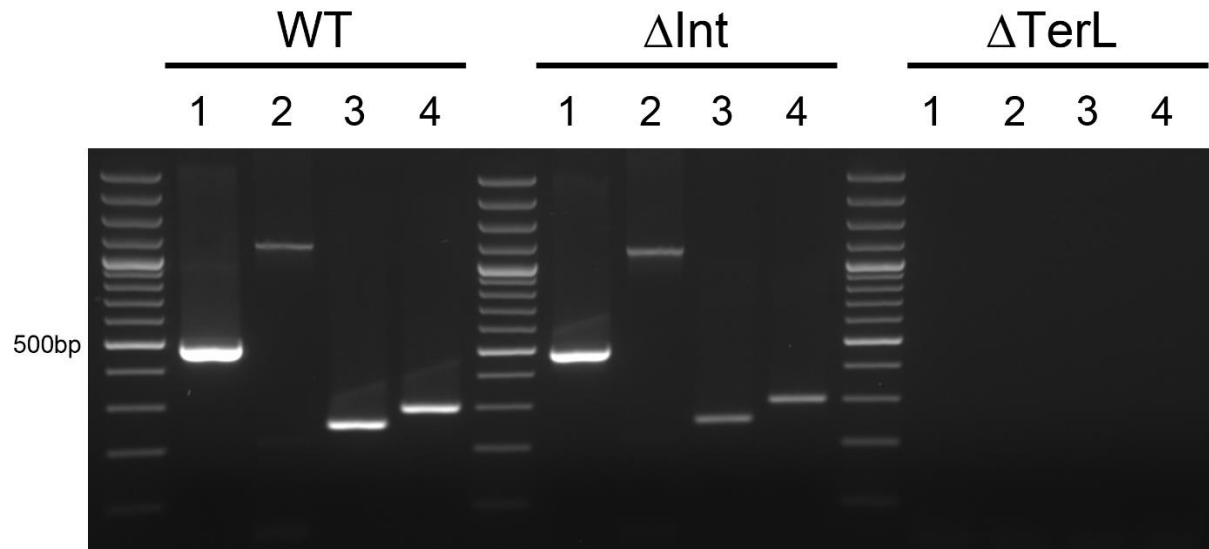

**Supplementary Figure S4. The role of  $\phi$ SaBov encoded integrase and terminase on phage DNA excision and packaging.** The integrase (SA1760) knock out ( $\Delta$ Int) and terminase large subunit (SA1726) knock out ( $\Delta$ TerL) strains were generated from RF122 *sem::tetM* by allelic replacement. Phage DNAs were extracted from these strains and tested by PCR and outward PCR as described in the text. Note that the  $\Delta$ Int strain showed identical PCR product patterns to the wild type strain, indicating a disruption of the integrase gene did not affect phage DNA excision and packaging. However, the  $\Delta$ TerL strain did not show any PCR products, most likely due to the inability to package phage DNA. Lane 1, outward PCR using primers pInt/p1702 (a marker for circular phage DNA of  $\phi$ SaBov<sub>N</sub>); lane 2, outward PCR using primers p1693/p1759 (a marker for circular phage DNA of  $\phi$ SaBov<sub>EGC</sub>); lane 3, PCR using primers semf/semr (a marker for  $\phi$ SaBov<sub>EGC</sub>); lane 4, PCR using primers pLukD/pLukE (a marker for  $\phi$ SaBov<sub>LUKE</sub>)

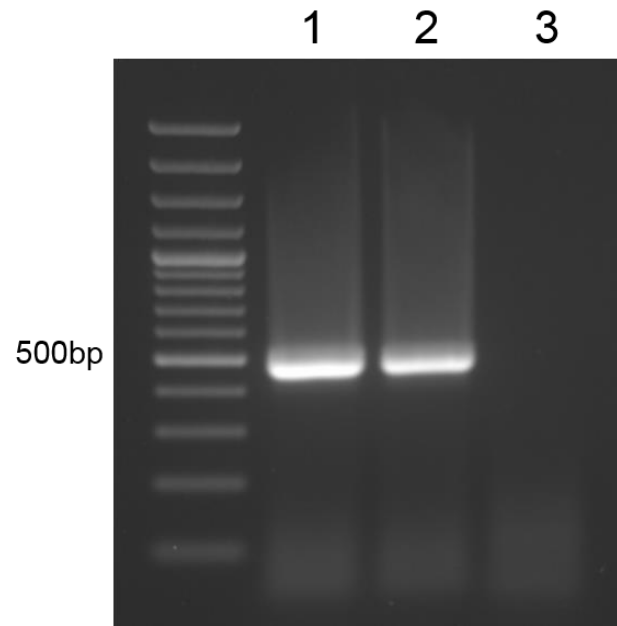

**Supplementary Figure S5. The excision and circularization of  $\phi$ SaBo<sub>VN</sub> is dependent on host background.** RF122 and RN4220 and MW2 strains carrying  $\phi$ SaBo<sub>VN</sub> were treated with mitomycin C and phage DNAs were extracted. Results shown are outward PCR with pIntF/p1702R primer set (a marker for circular phage DNA of  $\phi$ SaBo<sub>VN</sub>) using phage DNA template extracted from: Lane 1, RF122; lane 2, RN4220 carrying  $\phi$ SaBo<sub>VN</sub>; lane 3, MW2 carrying  $\phi$ SaBo<sub>VN</sub>. Note that the excision and circularization of the  $\phi$ SaBo<sub>VN</sub> phage DNA was observed in RF122 and RN4220 carrying the  $\phi$ SaBo<sub>VN</sub>, not in MW2 strain carrying the  $\phi$ SaBo<sub>VN</sub>, indicating the excision and circularization of the  $\phi$ SaBo<sub>VN</sub> phage DNA is dependent on host background.

**A****Intermediate form 1**Integration of  $\phi$ SaBoV<sub>N</sub> at attN<sub>R</sub> resulting introduction of attEGC<sub>R</sub>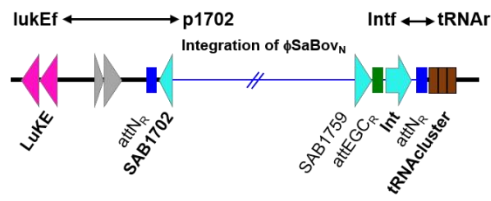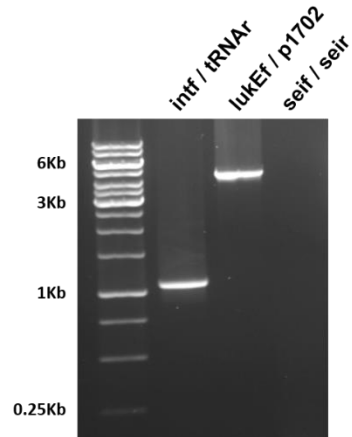**B****Intermediate form 2**Integration of  $\phi$ SaBoV<sub>EGC</sub> to attEGC<sub>R</sub> resulting transfer of the *egc* and duplication of phage related genes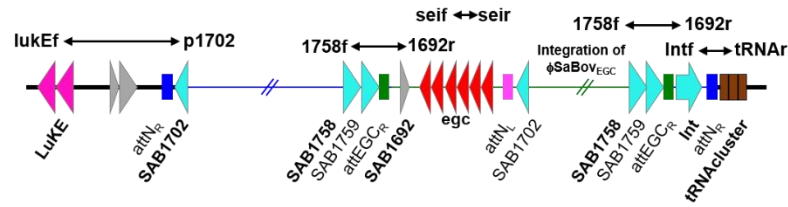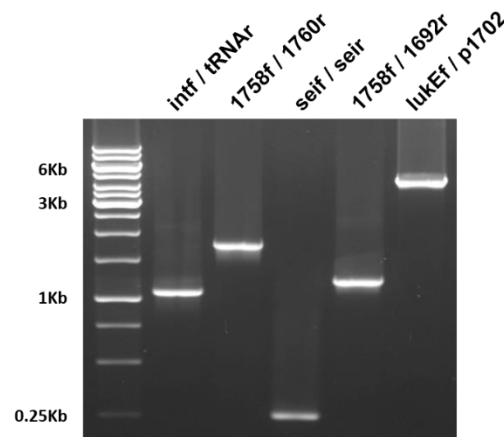

**Supplemental Figure S6. Identification of intermediate forms of transductants.** The MW2 strain transduced with phage induced from RF122 was randomly selected and screened by junction PCR. (A) Top panel: A schematic map of intermediate form of transductant just carrying the  $\phi$ SaBoV<sub>N</sub> at the tRNA cluster and locations of primer set for junction PCR. Bottom panel: Results of junction PCR were shown. PCR amplicons with *intf/tRNA<sub>r</sub>* and *lukEf/p1702* primer sets and no amplicon with *seif/seir* primer set indicate  $\phi$ SaBoV<sub>N</sub> was integrated at the attN<sub>R</sub> but not  $\phi$ SaBoV<sub>EGC</sub>. (B) Top panel: A schematic map of intermediate form of transductant harboring the integration of  $\phi$ SaBoV<sub>EGC</sub> at the attEGC<sub>R</sub>, resulting transfer of the *egc* and duplication of phage related genes. Bottom panel: Results of junction PCR were shown. PCR amplicons with *1758f/1692r*, *seif/seir*, and *1758f/1692r* primer sets indicate the integration of the  $\phi$ SaBoV<sub>EGC</sub> at the attEGC<sub>R</sub> and transfer of the *egc*. PCR amplicon with *lukEf/p1702* primer set indicates the duplication of phage related genes.

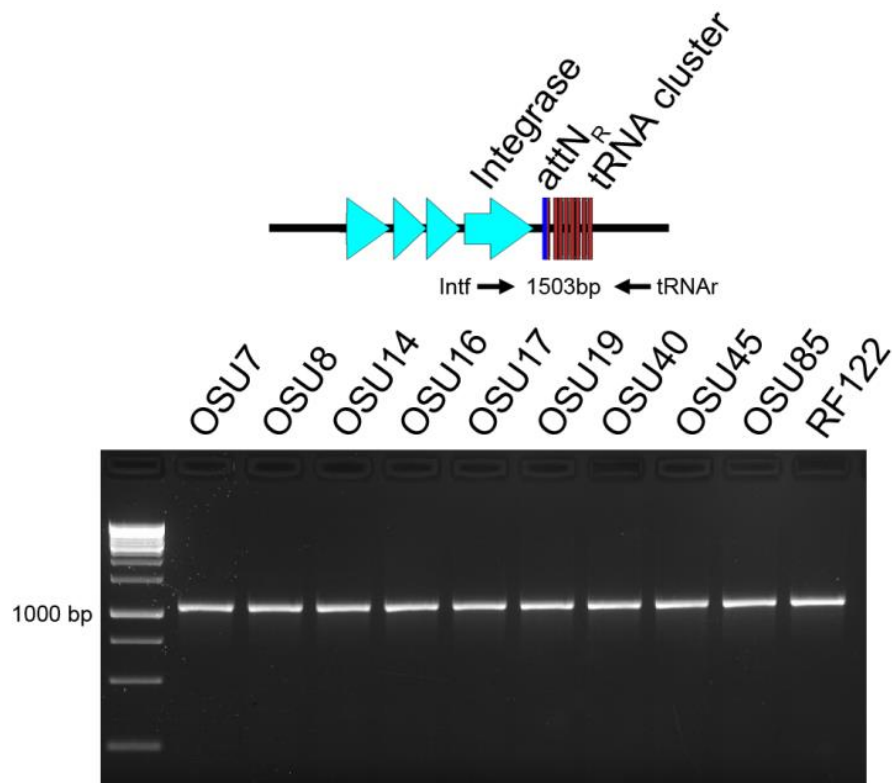

**Supplementary Figure S7. Screening of  $\phi$ SaBov in bovine mastitis isolates.** The insertion of phage in the vSa $\beta$  was screened by a primer pair as depicted in the figure. From a collection of 53 bovine mastitis strains isolated from Ohio state, USA from 2010 to 2013, 9 strains have a phage insertion at the same location in the strain RF122 as indicated by PCR results.

## References

- 1 MacDonald, K. L. *et al.* Toxic shock syndrome. A newly recognized complication of influenza and influenzalike illness. *JAMA* **257**, 1053-1058 (1987).
- 2 Schlievert, P. M., Strandberg, K. L., Lin, Y. C., Peterson, M. L. & Leung, D. Y. Secreted virulence factor comparison between methicillin-resistant and methicillin-sensitive *Staphylococcus aureus*, and its relevance to atopic dermatitis. *J Allergy Clin Immunol* **125**, 39-49 (2010).
- 3 Robinson, D. A. *et al.* Re-emergence of early pandemic *Staphylococcus aureus* as a community-acquired methicillin-resistant clone. *Lancet* **365**, 1256-1258 (2005).
- 4 Robinson, D. A. & Enright, M. C. Multilocus sequence typing and the evolution of methicillin-resistant *Staphylococcus aureus*. *Clin Microbiol Infect* **10**, 92-97 (2004).
- 5 Prevention, C. f. D. C. a. Four pediatric deaths from community-acquired methicillin-resistant *Staphylococcus aureus* - Minnesota and North Dakota, 1997-1999. Report No. 0149-2195 (Print) 0149-2195 (Linking), 707-710 (1999).
- 6 Baba, T. *et al.* Genome and virulence determinants of high virulence community-acquired MRSA. *Lancet* **359**, 1819-1827 (2002).
- 7 Rizkallah, M. F., Tolaymat, A., Martinez, J. S., Schlievert, P. M. & Ayoub, E. M. Toxic shock syndrome caused by a strain of *Staphylococcus aureus* that produces enterotoxin C but not toxic shock syndrome toxin-1. *Am J Dis Child* **143**, 848-849 (1989).
- 8 Fey, P. D. *et al.* Comparative molecular analysis of community- or hospital-acquired methicillin-resistant *Staphylococcus aureus*. *Antimicrob Agents Chemother* **47**, 196-203 (2003).
- 9 Joo, Y. S., Fox, L. K., Davis, W. C., Bohach, G. A. & Park, Y. H. *Staphylococcus aureus* associated with mammary glands of cows: genotyping to distinguish different strains among herds. *Vet Microbiol* **80**, 131-138 (2001).
- 10 Herron-Olson, L., Fitzgerald, J. R., Musser, J. M. & Kapur, V. Molecular correlates of host specialization in *Staphylococcus aureus*. *PLoS One* **2**, e1120 (2007).
- 11 Ohta, T. *et al.* Nucleotide substitutions in *Staphylococcus aureus* strains, Mu50, Mu3, and N315. *DNA Res* **11**, 51-56 (2004).
